# Supplementary material for: Reducing the carbon footprint of research: experience from the NightLife study
Source: PubMed Central journal article supplement — BMJ Open. 2023 Apr 24;13(4):e070200. doi: 10.1136/bmjopen-2022-070200 (PMC10151866; doi:10.1136/bmjopen-2022-070200), 2023-04-24

# BMJ Open

BMJ Open is committed to open peer review. As part of this commitment we make the peer review history of every article we publish publicly available.

When an article is published we post the peer reviewers' comments and the authors' responses online. We also post the versions of the paper that were used during peer review. These are the versions that the peer review comments apply to.

The versions of the paper that follow are the versions that were submitted during the peer review process. They are not the versions of record or the final published versions. They should not be cited or distributed as the published version of this manuscript.

BMJ Open is an open access journal and the full, final, typeset and author-corrected version of record of the manuscript is available on our site with no access controls, subscription charges or pay-per-view fees (<http://bmjopen.bmj.com>).

If you have any questions on BMJ Open's open peer review process please email [info.bmjopen@bmj.com](mailto:info.bmjopen@bmj.com)

# BMJ Open

## Reducing the carbon footprint of research: experience from the NightLife study

|                                 |                                                                                                                                                                                                                                                                                                                                                                                                                                                                                                                                                                                                                                                                                                                                                                                                                                                                                                                                                                                                                                                          |
|---------------------------------|----------------------------------------------------------------------------------------------------------------------------------------------------------------------------------------------------------------------------------------------------------------------------------------------------------------------------------------------------------------------------------------------------------------------------------------------------------------------------------------------------------------------------------------------------------------------------------------------------------------------------------------------------------------------------------------------------------------------------------------------------------------------------------------------------------------------------------------------------------------------------------------------------------------------------------------------------------------------------------------------------------------------------------------------------------|
| Journal:                        | <i>BMJ Open</i>                                                                                                                                                                                                                                                                                                                                                                                                                                                                                                                                                                                                                                                                                                                                                                                                                                                                                                                                                                                                                                          |
| Manuscript ID                   | bmjopen-2022-070200.R1                                                                                                                                                                                                                                                                                                                                                                                                                                                                                                                                                                                                                                                                                                                                                                                                                                                                                                                                                                                                                                   |
| Article Type:                   | Communication                                                                                                                                                                                                                                                                                                                                                                                                                                                                                                                                                                                                                                                                                                                                                                                                                                                                                                                                                                                                                                            |
| Date Submitted by the Author:   | 20-Dec-2022                                                                                                                                                                                                                                                                                                                                                                                                                                                                                                                                                                                                                                                                                                                                                                                                                                                                                                                                                                                                                                              |
| Complete List of Authors:       | <p>Quann, Niamh; University of Leicester College of Life Sciences, Leicester Clinical Trials Unit<br/> Burns, Steph; University Hospitals of Leicester NHS Trust<br/> Hull, Katherine; University Hospitals of Leicester NHS Trust, John Walls Renal Unit; University of Leicester, Department of Cardiovascular Sciences<br/> Cluley, Victoria; University of Leicester Department of Cardiovascular Sciences<br/> Richardson, Carla; University of Leicester College of Life Sciences, Leicester Clinical Trials Unit<br/> MacConaill, Kateryna; University Hospitals of Leicester NHS Trust, John Walls Renal Unit, Leicester General Hospital<br/> Conefrey, Carmel; University of Bristol Medical School<br/> Rooshenas, Leila; University of Bristol, School of Social and Community Medicine<br/> Eborall, Helen; University of Edinburgh , Usher Institute<br/> Burton, James; University of Leicester Department of Cardiovascular Sciences; University Hospitals of Leicester NHS Trust, John Walls Renal Unit, Leicester General Hospital</p> |
| <b>Primary Subject Heading</b>: | Renal medicine                                                                                                                                                                                                                                                                                                                                                                                                                                                                                                                                                                                                                                                                                                                                                                                                                                                                                                                                                                                                                                           |
| Secondary Subject Heading:      | Research methods                                                                                                                                                                                                                                                                                                                                                                                                                                                                                                                                                                                                                                                                                                                                                                                                                                                                                                                                                                                                                                         |
| Keywords:                       | Nephrology < INTERNAL MEDICINE, NEPHROLOGY, Dialysis < NEPHROLOGY, End stage renal failure < NEPHROLOGY, Quality of Life                                                                                                                                                                                                                                                                                                                                                                                                                                                                                                                                                                                                                                                                                                                                                                                                                                                                                                                                 |
|                                 |                                                                                                                                                                                                                                                                                                                                                                                                                                                                                                                                                                                                                                                                                                                                                                                                                                                                                                                                                                                                                                                          |

SCHOLARONE™  
Manuscripts

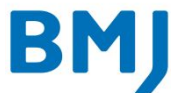

I, the Submitting Author has the right to grant and does grant on behalf of all authors of the Work (as defined in the below author licence), an exclusive licence and/or a non-exclusive licence for contributions from authors who are: i) UK Crown employees; ii) where BMJ has agreed a CC-BY licence shall apply, and/or iii) in accordance with the terms applicable for US Federal Government officers or employees acting as part of their official duties; on a worldwide, perpetual, irrevocable, royalty-free basis to BMJ Publishing Group Ltd ("BMJ") its licensees and where the relevant Journal is co-owned by BMJ to the co-owners of the Journal, to publish the Work in BMJ Open and any other BMJ products and to exploit all rights, as set out in our [licence](#).

The Submitting Author accepts and understands that any supply made under these terms is made by BMJ to the Submitting Author unless you are acting as an employee on behalf of your employer or a postgraduate student of an affiliated institution which is paying any applicable article publishing charge ("APC") for Open Access articles. Where the Submitting Author wishes to make the Work available on an Open Access basis (and intends to pay the relevant APC), the terms of reuse of such Open Access shall be governed by a Creative Commons licence – details of these licences and which [Creative Commons](#) licence will apply to this Work are set out in our licence referred to above.

Other than as permitted in any relevant BMJ Author's Self Archiving Policies, I confirm this Work has not been accepted for publication elsewhere, is not being considered for publication elsewhere and does not duplicate material already published. I confirm all authors consent to publication of this Work and authorise the granting of this licence.

## Reducing the carbon footprint of research: experience from the NightLife study

**Total number of words:** 1850 with abstract, 1725 without abstract

Niamh Quann<sup>1</sup>, Steph Burns<sup>2</sup>, Katherine L Hull<sup>3,4</sup>, Victoria Cluley<sup>3</sup>, Carla Richardson<sup>1</sup>, Kateryna MacConaill<sup>3,4</sup>, Carmel Conefrey<sup>5</sup>, Leila Rooshenas<sup>5</sup>, Helen Eborall<sup>6</sup>, James O Burton<sup>3,4,7</sup> on behalf of the NightLife Study Team

<sup>1</sup>Leicester Clinical Trials Unit, College of Life Sciences, University of Leicester, Leicester, UK

<sup>2</sup>University Hospitals of Leicester NHS Trust, Leicester, UK

<sup>3</sup>Department of Cardiovascular Sciences, College of Life Sciences, University of Leicester, Leicester, UK

<sup>4</sup>John Walls Renal Unit, Leicester General Hospital, University Hospitals of Leicester NHS Trust, Leicester, UK

<sup>5</sup>Population Health Sciences, Bristol Medical School, University of Bristol, UK

<sup>6</sup>Usher Institute, College of Medicine and Veterinary Medicine, University of Edinburgh

<sup>7</sup>School of Sport, Exercise and Health Sciences, Loughborough University, Loughborough, UK

**Name, address, e-mail address and telephone number of the corresponding author:** Niamh Quann, Leicester Clinical Trials Unit, College of Life Sciences, University of Leicester, University Road, Leicester, LE1 7RH, UK. Email: [nq8@le.ac.uk](mailto:nq8@le.ac.uk).

**Key words:** Carbon footprint, CO<sub>2</sub> emissions, climate change, environmental sustainability, carbon reduction, carbon impact, clinical trials, trial conduct, randomised controlled trial

**Abstract**

The National Health Service (NHS) has made a commitment to meet targets set by the UK Climate Change Act (2008). Research forms a core part of the NHS. Tackling environmental sustainability challenges is fundamental to reducing the carbon footprint of clinical trials. The National Institute for Health and Care Research (NIHR) provide guidelines and recommendations in their 'Carbon Reduction Strategy' (2019). While climate change and CO<sub>2</sub> emissions are significant issues, research sustainability and support from funding organisations is lacking. Policies and requirements from funding organisations do not mirror the global emphasis on carbon reduction. This communication reports the reduction in the carbon footprint of the NightLife study (ISRCTN87042063), an ongoing multi-centre randomised controlled trial assessing the impact of in-centre nocturnal haemodialysis on quality of life.

1  
2  
3 Following the declaration of the COVID-19 pandemic outbreak by the World Health Organization  
4 (WHO)(1) in March 2020, the UK Government implemented a series of restrictions limiting face-to-  
5 face contact and enforcing social distancing. This had a significant impact on the delivery and  
6 conduct of health research. Adaptation required resourceful approaches to ensure patient safety  
7 and data integrity. Driven by the pandemic, trial management teams, working closely with Principal  
8 Investigators (PI) and Trial Management Groups (TMG), played a key role in rapidly adjusting the way  
9 clinical trials were designed and undertaken (2). While reductions in the carbon footprint of research  
10 activities were not the driving force for the changes required during the pandemic, it was  
11 nevertheless a significant and positive outcome. It is important that, where possible, clinical trials  
12 use these approaches to ensure carbon reductions and demonstrate an ongoing, responsible  
13 commitment to sustainability.  
14  
15  
16  
17  
18  
19  
20  
21  
22  
23  
24  
25  
26  
27  
28  
29

### 30 **Overview of the NightLife study**

31  
32 The NightLife study is an ongoing randomised controlled trial (RCT) using mixed methods to assess  
33 the effectiveness and cost effectiveness of thrice weekly, extended hours, in-centre nocturnal  
34 haemodialysis in comparison to standard care. The study is funded by the NIHR (funder reference  
35 NIHR127440; REC reference 20/WM/0275), sponsored by the University of Leicester and co-  
36 ordinated by the Leicester Clinical Trials Unit (LCTU). It includes three main workstreams: a RCT and  
37 internal pilot (workstream 1), an ongoing process evaluation (workstream 2) and a QuinteT  
38 Recruitment Intervention (QRI, workstream 3) (3).  
39  
40  
41  
42  
43  
44  
45  
46  
47  
48  
49

### 50 **Adjustments to the NightLife study delivery in response to the COVID-19 pandemic**

51 All TMG, oversight committee and Patient Participation, Involvement and Engagement (PPIE)  
52 meetings were reconfigured and held online. Following UK Government instruction, staff worked  
53 from home wherever possible. Recruitment, feasibility assessments, site selection and initiation  
54  
55  
56  
57  
58  
59  
60

1  
2  
3 visits were completed remotely. Queries and outstanding actions resolved via email  
4  
5 correspondence.

6  
7 Qualitative data collection through ethnographic methods and interviews with the research team,  
8  
9 dialysis unit staff and individuals with kidney disease were paused and additional data collection  
10  
11 techniques were considered to reduce face-to-face contact. This included virtual interviews using  
12  
13 common conference software programmes and 'photovoice'; a participatory research method that  
14  
15 utilises participant-led photography of the phenomena being researched (in this case, the lived  
16  
17 experience of haemodialysis) and allows remote access to experiences and phenomena outside of  
18  
19 the immediate field of study (4, 5).  
20  
21  
22  
23  
24

### 25 **Calculation of carbon footprint**

26  
27 Using a web-based carbon footprint calculator (6, 7), the CO<sub>2</sub> emissions saved by converting to  
28  
29 virtual approaches, home working and alternative qualitative data collection techniques were  
30  
31 estimated. The calculator took into account: travel modality (including specific features such as  
32  
33 vehicle and fuel type), number of people travelling and distance in miles. For air travel, airport codes  
34  
35 and flight class were considered. Carbon savings were calculated over the first 18 months of the  
36  
37 NightLife study.  
38  
39  
40  
41  
42

### 43 **What have we learnt?**

#### 44 ***Carbon reduction***

45  
46 To date, innovative changes to the management of the NightLife study have resulted in a net CO<sub>2</sub>  
47  
48 reduction of 136 tonnes. The CO<sub>2</sub> reduction of each workstream is outlined below, with real-life  
49  
50 equivalent values detailed in table 1 (6, 7).  
51  
52  
53  
54  
55  
56  
57  
58  
59  
60

**Table 1:** Table summarising the net CO<sub>2</sub> emission reduction for each workstream and equivalent values (6, 7)

| Workstream            | Net CO <sub>2</sub> emission reduction | Equivalent value                         |
|-----------------------|----------------------------------------|------------------------------------------|
| <b>Workstream 1</b>   | 12 tonnes                              | 12 trees planted                         |
|                       |                                        | 6,000 CO <sub>2</sub> fire extinguishers |
| <b>Workstream 2</b>   | 20 tonnes                              | 20 trees planted                         |
|                       |                                        | 20 x 500m <sup>3</sup> hot air balloons  |
| <b>Workstream 3</b>   | 0.32 tonnes                            | Approximately half a tree planted        |
|                       |                                        | 38,926 smartphones charged               |
| <b>Other benefits</b> | 104 tonnes                             | 104 trees planted                        |
|                       |                                        | Driving 624,000km in a diesel car        |
| <b>Total</b>          | 136 tonnes                             | 136 trees planted                        |
|                       |                                        | 586 return flights from London to Rome   |

### **Workstream 1**

The net saving for workstream 1 was 12 tonnes (emissions reduced 12 tonnes; emissions used 0).

Key savings were related to travel due to online reconfiguration of study meetings, UK-wide site selection visits and SIVs.

### **Workstream 2**

The net saving for workstream 2 was 20 tonnes (total emissions reduced 20 tonnes; emissions used 0.74 tonnes). 50% of participants opted for virtual interviews/'photovoice' in place of traditional ethnographic methods such as face-to-face semi-structured interviews. Subsequently, researcher travel to base hospitals and satellite haemodialysis units was also reduced by 50%. The purchase of a smartphone and two electronic tablets incurred a CO<sub>2</sub> emission of 0.74 tonnes.



### **Workstream 3**

The net saving for workstream 3 was 0.32 tonnes (total emissions saved 0.32; emissions used 0).

Researcher travel was reduced by 100% as semi-structured interviews, attendance and observations of, TMG meetings, investigator meetings and SIVs, and provision of feedback regarding recruitment to participating units were completed remotely.

### **Cost savings**

All adaptations to the study organisation, management and design were made within the original study budget and resulted in significant cost savings. This included costs for travel, consumables and researcher time. The underspend was repurposed for researcher training, participant benefit and further opportunities for scientific communication (conference attendance and publication open access dissemination costs) following funder approval.

### **Other benefits**

Additional carbon savings were incurred through virtual attendance at national and international conferences and reduced travel due to home-working, saving 71 tonnes and 33 tonnes respectively across all workstreams. Virtual PPIE activities resulted in geographical and ethnic diversity of group members as individuals joined from various locations across the UK (see figure 1).

### **The value of this experience**

To date, adaptations to the management of the NightLife study have resulted in a net reduction of 136 tonnes of CO<sub>2</sub>. Key savings were related to travel due to reconfiguration of study meetings, UK-wide site selection visits and SIVs. Extrapolating these data forward will lead to further increases in savings over the five year study period based on a hybrid approach now that restrictions have been lifted.

1  
2  
3  
4  
5 The benefits of the NightLife study adaptations go beyond the positive environmental impact.

6  
7 Interestingly, 50% of participants opted for virtual interviews and/or 'photovoice' in place of face-to-  
8  
9 face semi-structured interviews, which revealed a holistic insight into the lived experience of  
10  
11 haemodialysis. Photovoice allowed the researcher to approach the observational element  
12  
13 differently, allowing participants to lead data collection and extend it into their home life; the  
14  
15 experience of haemodialysis is a constant life disruption, not limited to the time spent in the clinical  
16  
17 environment. This added richness in findings that may not have been achieved with traditional  
18  
19 ethnographic methods alone.  
20  
21  
22  
23

24  
25 All adaptations to the study organisation, management and design were made within the original  
26  
27 study budget and resulted in significant cost savings which were repurposed following funder  
28  
29 approval. Additional carbon savings were incurred through virtual attendance at national and  
30  
31 international conferences and reduced travel due to home-working.  
32  
33

34  
35 Teleconferencing, video-conferencing and web-based training materials were proven to be effective,  
36  
37 with positive working relationships built and maintained. The inaugural investigator meeting was  
38  
39 held entirely remotely with more than 40 attendees from the research and nephrology community  
40  
41 across the UK. The virtual nature of TMG, Data Safety Monitoring Committee (DSMC) and Trial  
42  
43 Steering Committee (TSC) meetings allowed more flexibility for meeting attendance, particularly for  
44  
45 committee members based abroad. Indeed, the frequency of these meetings was increased to  
46  
47 support the ongoing oversight of the study at no additional cost. However, there is room and need  
48  
49 for hybrid approaches to some clinical trial activities, with an acceptance of some CO<sub>2</sub> emissions.  
50  
51  
52  
53

54  
55 Debates are ongoing about how to incorporate a diverse range of patient voices in the design and  
56  
57 delivery of research, highlighting a lack of diversity and inclusion (8). The use of alternative meeting  
58  
59  
60

1  
2  
3 techniques as part of the NightLife study resulted in both geographical and ethnic diversity of the  
4  
5 PPIE group, enriching the feedback of the lived experience of kidney disease and haemodialysis.  
6  
7  
8  
9

10 The findings of our work are supported by a retrospective analysis of 12 pragmatic randomised  
11  
12 control trials (9); CO<sub>2</sub> emissions are often generated in areas where steps could be taken to reduce  
13  
14 them, such as travel and trial conduct. Resistance to such changes, however, is common. Trial-  
15  
16 related travel is often comprised of heavy carbon emissions (particularly where multi-centre studies  
17  
18 are concerned). Traditionally this has included travel to SIVs across the UK (by rail and road), as well  
19  
20 as investigator meetings which often include international travel (by air), oversight committee  
21  
22 meetings, training, onsite monitoring and closedown visits, as well as conference attendance  
23  
24 throughout the study's duration. These are travel related activities that most Clinical Trials Units  
25  
26 (CTUs) cost for when considering the generation of a trial grant. This is generally done by aligning  
27  
28 activities and associated costs with the risk of study. For example, clinical trials of investigational  
29  
30 medicinal products (CTIMPs) are deemed higher risk, therefore onsite monitoring of participating  
31  
32 sites and pharmacies and resulting travel is a necessity. However, where trials are not bound by such  
33  
34 strict legislation, COVID-19 has presented an opportunity to change these practices in a way that  
35  
36 reduces the trial's carbon footprint, as reflected by our changes in the NightLife study.  
37  
38  
39  
40  
41  
42  
43

44 Typically, most CTUs continue to utilise paper Investigator Site Files (ISFs). However, this approach to  
45  
46 trial organisation and data management is being challenged and there is widespread recognition  
47  
48 from the research community for significant improvements in environmental sustainability within  
49  
50 clinical trials (10) . There are many ways to reduce waste with increasing scope to switch from paper  
51  
52 to electronic trial management systems (e.g. ISFs) in order to (i) minimise paper usage and storage  
53  
54 requirements; (ii) increase document accessibility; (iii) streamline management, monitoring and  
55  
56 archiving of multi-centre clinical trials and; (iv) reduce monetary costs. Adshead *et al* suggest that  
57  
58 clinical trials with a lower carbon footprint should be prioritised by funders, and just as researchers  
59  
60

1  
2  
3 have to justify to funders the budget for a trial, they should also have to justify the carbon footprint  
4  
5 to their stakeholders and demonstrate that it as low as possible (10).  
6  
7  
8  
9

### 10 **An aid for future trial design and further work**

11  
12 To the authors' knowledge, this is one of few articles to consider and evaluate the environmental  
13  
14 improvements that can be made by remote working and virtual adaptations to study designs when  
15  
16 establishing a multi-centre RCT in patients with end-stage kidney disease. This work has the  
17  
18 potential to act as a guide for other clinical trials to reduce cost and their environmental impact. It  
19  
20 also demonstrates how to enhance geographical diversity of research teams (including PPIE  
21  
22 members) without excessive cost.  
23  
24  
25  
26  
27

### 28 **Take home messages**

29  
30 The COVID-19 pandemic presented a need to adapt clinical trials to protect patients, carers, clinical  
31  
32 teams and researchers, and accelerated a pre-existing drive to reduce the carbon footprint of  
33  
34 research. Study processes needed to evolve rapidly to ensure they were robust and financially lean  
35  
36 in the COVID-19 era. The legacy of such changes has been wide ranging but of note, the impact on  
37  
38 CO<sub>2</sub> emission reduction experienced in the NightLife study is a benefit that should inspire and drive  
39  
40 the reduction of the carbon impact of all clinical trials from now and into the future. We have  
41  
42 highlighted opportunities for investigators and trial management teams to implement alternative  
43  
44 approaches to designing and conducting clinical trials in order to make them less carbon intensive,  
45  
46 more environmentally sustainable and better value for money.  
47  
48  
49  
50  
51  
52  
53  
54  
55  
56  
57  
58  
59  
60

**Contributors**

The paper was conceived by NQ and JB. SB performed the carbon footprint calculations. NQ, JB, KH, VC, CR, KM, CC, LR and HE reviewed and approved the final draft submitted.

**Funding**

The NightLife study is funded by the National Institute for Health and Care Research (NIHR) Health Technology Assessment (HTA) programme (funder reference: NIHR127440). The views expressed are those of the author(s) and not necessarily those of the NIHR or the Department of Health and Social Care.

**Competing interests**

None declared.

**Patient consent**

Not required.

**Provenance and peer review**

Not commissioned; externally peer reviewed.

**Data sharing statement**

All data relevant to the study are included in the article.

## References

1. The World Health Organisation (WHO). WHO Director-General's opening remarks at the media briefing on COVID-19 - 11 March 2020 2020 [Available from: <https://www.who.int/director-general/speeches/detail/who-director-general-s-opening-remarks-at-the-media-briefing-on-covid-19---11-march-2020>].
2. Mitchell EJ, Ahmed K, Breeman S, Cotton S, Constable L, Ferry G, et al. It is unprecedented: trial management during the COVID-19 pandemic and beyond. *Trials*. 2020;21(1):784.
3. Donovan JL, Rooshenas L, Jepson M, Elliott D, Wade J, Avery K, et al. Optimising recruitment and informed consent in randomised controlled trials: the development and implementation of the Quintet Recruitment Intervention (QRI). *Trials*. 2016;17(1):283.
4. Cluley V. Using photovoice to include people with profound and multiple learning disabilities in inclusive research. *British Journal of Learning Disabilities*. 2017;45(1):39-46.
5. Cluley V, Pilnick A, Fyson R. Improving the inclusivity and credibility of visual research: interpretive engagement as a route to including the voices of people with learning disabilities in analysis. *Visual Studies*. 2021;36(4-5):524-36.
6. Carbon Calculator - Carbon Footprint Calculator For Individuals And Households [Available from: <https://www.carbonfootprint.com/calculator.aspx>].
7. Campaign TL. Carbon footprint calculator [Available from: <https://trees4lifecampaign.com/carbon-footprint-calculator/>].
8. Tierney S, Dawson S, Boylan A-M, Richards G, Park S, Turk A, et al. Broadening diversity through creative involvement to identify research priorities. *Research Involvement and Engagement*. 2021;7(1):1-10.
9. Lyle K, Dent L, Bailey S, Kerridge L, Roberts I, Milne R. Carbon cost of pragmatic randomised controlled trials: retrospective analysis of sample of trials. *BMJ*. 2009;339.
10. Adshead F, Salman RA-S, Aumonier S, Collins M, Hood K, McNamara C, et al. A strategy to reduce the carbon footprint of clinical trials. *The Lancet*. 2021;398(10297):281-2.

1  
2  
3  
4  
5  
6  
7  
8  
9  
10  
11  
12  
13  
14  
15  
16  
17  
18  
19  
20  
21  
22  
23  
24  
25  
26  
27  
28  
29  
30  
31  
32  
33  
34  
35  
36  
37  
38  
39  
40  
41  
42  
43  
44  
45  
46  
47  
48  
49  
50  
51  
52  
53  
54  
55  
56  
57  
58  
59  
60

**Figures**

Figure 1: Map of UK showing geographical locations of PPIE group members

**Tables**

Table 1: Table summarising the net CO<sub>2</sub> emission reduction for each workstream and equivalent values

For peer review only

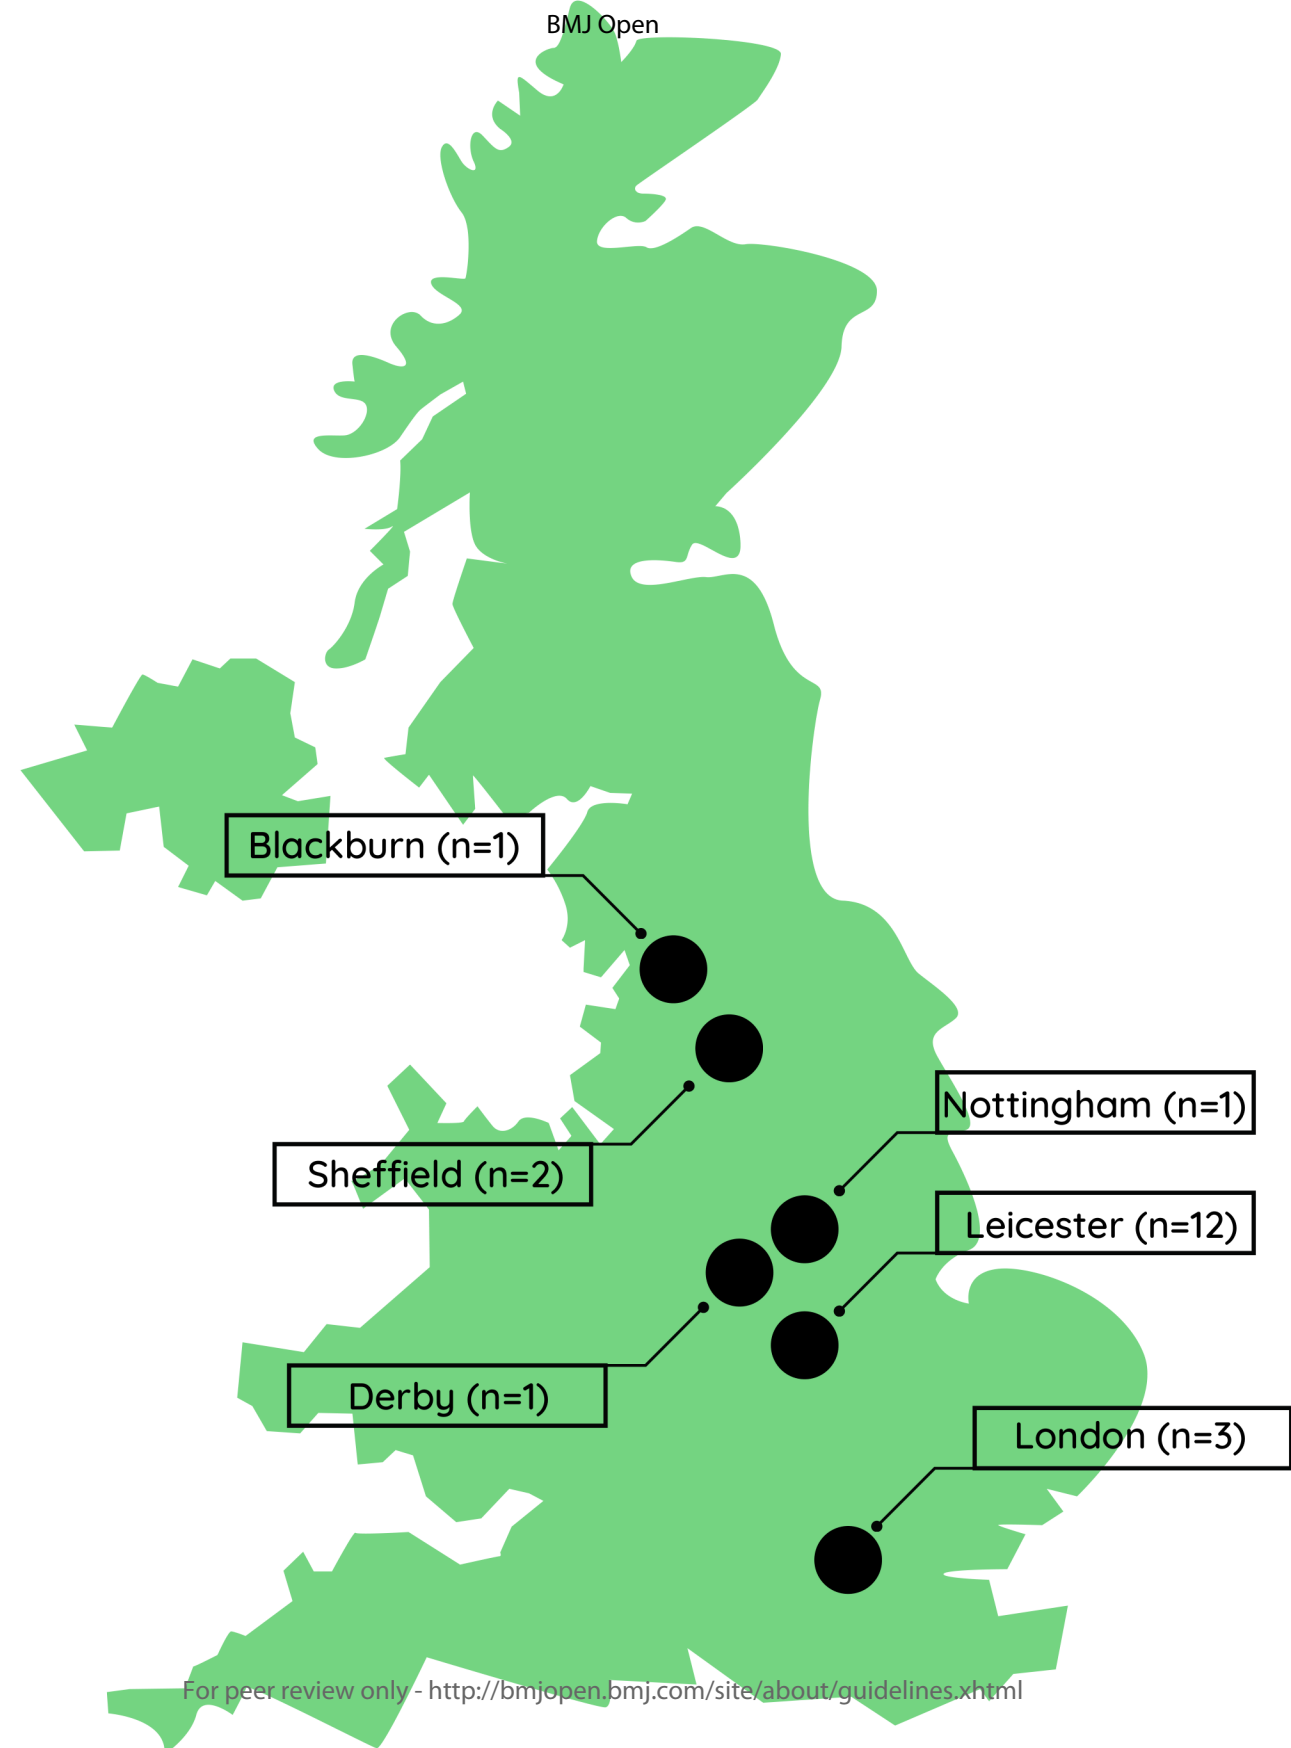

1  
2  
3  
4  
5  
6  
7  
8  
9  
10  
11  
12  
13  
14  
15  
16  
17  
18  
19  
20  
21  
22  
23  
24  
25  
26  
27  
28  
29  
30  
31  
32  
33  
34  
35  
36  
37  
38  
39  
40  
41  
42  
43  
44  
45  
46  
47  
48  
49  
50  
51  
52  
53



# BMJ Open

## Reducing the carbon footprint of research: experience from the NightLife study

|                                 |                                                                                                                                                                                                                                                                                                                                                                                                                                                                                                                                                                                                                                                                                                                                                                                                                                                                                                                                                                                                                                 |
|---------------------------------|---------------------------------------------------------------------------------------------------------------------------------------------------------------------------------------------------------------------------------------------------------------------------------------------------------------------------------------------------------------------------------------------------------------------------------------------------------------------------------------------------------------------------------------------------------------------------------------------------------------------------------------------------------------------------------------------------------------------------------------------------------------------------------------------------------------------------------------------------------------------------------------------------------------------------------------------------------------------------------------------------------------------------------|
| Journal:                        | <i>BMJ Open</i>                                                                                                                                                                                                                                                                                                                                                                                                                                                                                                                                                                                                                                                                                                                                                                                                                                                                                                                                                                                                                 |
| Manuscript ID                   | bmjopen-2022-070200.R2                                                                                                                                                                                                                                                                                                                                                                                                                                                                                                                                                                                                                                                                                                                                                                                                                                                                                                                                                                                                          |
| Article Type:                   | Communication                                                                                                                                                                                                                                                                                                                                                                                                                                                                                                                                                                                                                                                                                                                                                                                                                                                                                                                                                                                                                   |
| Date Submitted by the Author:   | 16-Feb-2023                                                                                                                                                                                                                                                                                                                                                                                                                                                                                                                                                                                                                                                                                                                                                                                                                                                                                                                                                                                                                     |
| Complete List of Authors:       | Quann, Niamh; University of Leicester College of Life Sciences, Leicester Clinical Trials Unit<br>Burns, Steph; University Hospitals of Leicester NHS Trust<br>Hull, Katherine; University Hospitals of Leicester NHS Trust, John Walls Renal Unit; University of Leicester, Department of Cardiovascular Sciences<br>Cluley, Victoria; University of Leicester Department of Cardiovascular Sciences<br>Richardson, Carla; University of Leicester College of Life Sciences, Leicester Clinical Trials Unit<br>MacConaill, Kateryna; University Hospitals of Leicester NHS Trust, John Walls Renal Unit, Leicester General Hospital<br>Conefrey, Carmel; University of Bristol Medical School<br>Rooshenas, Leila; University of Bristol, School of Social and Community Medicine<br>Eborall, Helen; University of Edinburgh , Usher Institute<br>Burton, James; University of Leicester Department of Cardiovascular Sciences; University Hospitals of Leicester NHS Trust, John Walls Renal Unit, Leicester General Hospital |
| <b>Primary Subject Heading</b>: | Renal medicine                                                                                                                                                                                                                                                                                                                                                                                                                                                                                                                                                                                                                                                                                                                                                                                                                                                                                                                                                                                                                  |
| Secondary Subject Heading:      | Research methods                                                                                                                                                                                                                                                                                                                                                                                                                                                                                                                                                                                                                                                                                                                                                                                                                                                                                                                                                                                                                |
| Keywords:                       | Nephrology < INTERNAL MEDICINE, NEPHROLOGY, Dialysis < NEPHROLOGY, End stage renal failure < NEPHROLOGY, Quality of Life                                                                                                                                                                                                                                                                                                                                                                                                                                                                                                                                                                                                                                                                                                                                                                                                                                                                                                        |
|                                 |                                                                                                                                                                                                                                                                                                                                                                                                                                                                                                                                                                                                                                                                                                                                                                                                                                                                                                                                                                                                                                 |

SCHOLARONE™  
Manuscripts

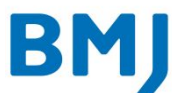

I, the Submitting Author has the right to grant and does grant on behalf of all authors of the Work (as defined in the below author licence), an exclusive licence and/or a non-exclusive licence for contributions from authors who are: i) UK Crown employees; ii) where BMJ has agreed a CC-BY licence shall apply, and/or iii) in accordance with the terms applicable for US Federal Government officers or employees acting as part of their official duties; on a worldwide, perpetual, irrevocable, royalty-free basis to BMJ Publishing Group Ltd ("BMJ") its licensees and where the relevant Journal is co-owned by BMJ to the co-owners of the Journal, to publish the Work in BMJ Open and any other BMJ products and to exploit all rights, as set out in our [licence](#).

The Submitting Author accepts and understands that any supply made under these terms is made by BMJ to the Submitting Author unless you are acting as an employee on behalf of your employer or a postgraduate student of an affiliated institution which is paying any applicable article publishing charge ("APC") for Open Access articles. Where the Submitting Author wishes to make the Work available on an Open Access basis (and intends to pay the relevant APC), the terms of reuse of such Open Access shall be governed by a Creative Commons licence – details of these licences and which [Creative Commons](#) licence will apply to this Work are set out in our licence referred to above.

Other than as permitted in any relevant BMJ Author's Self Archiving Policies, I confirm this Work has not been accepted for publication elsewhere, is not being considered for publication elsewhere and does not duplicate material already published. I confirm all authors consent to publication of this Work and authorise the granting of this licence.

1  
2  
3 1 **Reducing the carbon footprint of research: experience from the NightLife study**

4  
5 2 **Total number of words:** 1982 with abstract, 1793 without abstract

6  
7 3

8  
9 4 Niamh Quann<sup>1</sup>, Steph Burns<sup>2</sup>, Katherine L Hull<sup>3,4</sup>, Victoria Cluley<sup>3</sup>, Carla Richardson<sup>1</sup>, Kateryna

10  
11 5 MacConaill<sup>3,4</sup>, Carmel Conefrey<sup>5</sup>, Leila Rooshenas<sup>5</sup>, Helen Eborall<sup>6</sup>, James O Burton<sup>3,4,7</sup> on behalf of

12  
13 6 the NightLife Study Team

14  
15 7 <sup>1</sup>Leicester Clinical Trials Unit, College of Life Sciences, University of Leicester, Leicester, UK

16  
17 8 <sup>2</sup>University Hospitals of Leicester NHS Trust, Leicester, UK

18  
19 9 <sup>3</sup>Department of Cardiovascular Sciences, College of Life Sciences, University of Leicester, Leicester,

20  
21 10 UK

22  
23 11 <sup>4</sup>John Walls Renal Unit, Leicester General Hospital, University Hospitals of Leicester NHS Trust,

24  
25 12 Leicester, UK

26  
27 13 <sup>5</sup>Population Health Sciences, Bristol Medical School, University of Bristol, UK

28  
29 14 <sup>6</sup>Usher Institute, College of Medicine and Veterinary Medicine, University of Edinburgh

30  
31 15 <sup>7</sup>School of Sport, Exercise and Health Sciences, Loughborough University, Loughborough, UK

32  
33 16

34  
35 17 **Name, address, e-mail address and telephone number of the corresponding author:** Niamh Quann,

36  
37 18 Leicester Clinical Trials Unit, College of Life Sciences, University of Leicester, University Road,

38  
39 19 Leicester, LE1 7RH, UK. Email: [nq8@le.ac.uk](mailto:nq8@le.ac.uk).

40  
41 20

42  
43 21 **Key words:** Carbon footprint, CO<sub>2</sub> emissions, climate change, environmental sustainability, carbon

44  
45 22 reduction, carbon impact, clinical trials, trial conduct, randomised controlled trial

46  
47 23

1  
2  
3 24 **Abstract**  
4

5 25 As set out in the Climate Change Act (2008), the UK National Health Service (NHS) has made a  
6  
7 26 commitment to halve greenhouse gas emissions by 2025 and reach net-zero by 2050. Research  
8  
9  
10 27 forms a core part of NHS research activity; reducing the carbon footprint of clinical trials is a core  
11  
12 28 element of the National Institute for Health and Care Research (NIHR) 'Carbon Reduction Strategy'  
13  
14 29 (2019). However, support from funding organisations on how to achieve these targets is lacking.  
15  
16 30 This brief communication reports the reduction in the carbon footprint of the NightLife study; an  
17  
18 31 ongoing multi-centre randomised controlled trial assessing the impact of in-centre nocturnal  
19  
20 32 haemodialysis on quality of life. By using remote conferencing software and innovative data  
21  
22 33 collection methods, we demonstrated a total saving of 136 tonnes of carbon dioxide equivalent  
23  
24 34 (CO<sub>2</sub>e) over three workstreams during the first 18 months of the study, following grant activation on  
25  
26 35 1<sup>st</sup> January 2020. In addition to the environmental impact, there were additional benefits seen to  
27  
28 36 cost as well as increased participant diversity and inclusion. This highlights ways to make trials less  
29  
30 37 carbon intensive, more environmentally sustainable and better value for money.  
31  
32  
33  
34  
35  
36  
37  
38  
39  
40  
41  
42  
43  
44  
45  
46  
47  
48  
49  
50  
51  
52  
53  
54  
55  
56  
57  
58  
59  
60

## 38 **Introduction**

39 The social distancing restrictions implemented during the COVID-19 pandemic (1) had a significant  
40 impact on the delivery and conduct of health research in the UK. Trial management teams played a  
41 key role in rapidly adjusting the way clinical trials were designed and undertaken (1). Although  
42 reductions in the carbon footprint of research activities were not the driving force for the changes  
43 required during the pandemic, it was nevertheless a significant and positive outcome. It is important  
44 that, where possible, clinical trials use these approaches to ensure CO<sub>2</sub>e savings and demonstrate an  
45 ongoing, responsible commitment to sustainability.

## 47 **Overview of the NightLife study**

48 The NightLife study is an ongoing randomised controlled trial (RCT) using mixed methods to assess  
49 the clinical and cost effectiveness of thrice weekly, extended hours, in-centre nocturnal  
50 haemodialysis in comparison to standard care (ISRCTN87042063(2); see study website(3)). The study  
51 includes three main workstreams: an RCT and internal pilot (workstream 1), an ongoing process  
52 evaluation (workstream 2) and a QuinteT Recruitment Intervention (QRI, workstream 3) (4).

## 54 **Adjustments to the NightLife study delivery in response to the COVID-19 pandemic**

55 Prior to the COVID-19 pandemic, it was planned to conduct all meetings and qualitative study  
56 elements in a face-to-face manner by ≥20 collaborators across the UK. This included in-person study  
57 launch and oversight committee meetings. Following UK Government instruction, staff worked from  
58 home wherever possible. All meetings, including trial management, oversight committee, patient  
59 experience and site feasibility were reconfigured and held online. Queries and outstanding actions  
60 were resolved via email correspondence. While study processes were conducted remotely, the  
61 patient population (adults receiving thrice weekly in-centre haemodialysis) enabled in-person  
62 recruitment for workstream 2, however all qualitative data was collected remotely. Workstream 1

1  
2  
3 63 and workstream 3 (which were due to run in parallel) were paused for nine months due to the  
4  
5 64 impact of COVID-19 on research delivery.  
6  
7  
8 65

9  
10 66 Qualitative data collection through ethnographic methods (in-person observations and real-time  
11  
12 67 field notes) and interviews with the research team, dialysis unit staff and individuals with kidney  
13  
14 68 disease were paused and additional data collection techniques were considered to reduce face-to-  
15  
16 69 face contact. This included virtual interviews using common conference software programmes and  
17  
18 70 'photovoice'; a participatory research method that utilises participant-led photography of the  
19  
20 71 phenomena being researched (in this case, the lived experience of haemodialysis) and allows remote  
21  
22 72 access to experiences and phenomena outside of the immediate field of study (5, 6).  
23  
24  
25  
26 73

#### 27 28 74 **Calculation of carbon footprint**

29  
30 75 The original grant application outlined the total number of planned face-to-face meetings and  
31  
32 76 related costings for the duration of the study. This was used to map the study activities which were  
33  
34 77 reconfigured to virtual methods. Using a web-based carbon footprint calculator (7), the CO<sub>2</sub>e saved  
35  
36 78 by converting to virtual approaches, home working and alternative qualitative data collection  
37  
38 79 techniques were estimated. The calculator took into account: travel modality (rail, car, bicycle, air  
40  
41 80 travel), specific features such as vehicle and fuel type, number of people travelling and distance in  
42  
43 81 miles. For air travel, airport codes and flight class were considered. Estimated CO<sub>2</sub>e savings were  
44  
45 82 calculated over the first 18 months of the NightLife study.  
46  
47  
48 83

#### 49 50 84 **What have we learnt?**

##### 51 52 85 ***Carbon reduction***

53  
54 86 To date, innovative changes to the management of the NightLife study have resulted in an estimated  
55  
56 87 net CO<sub>2</sub>e saving of 136 tonnes. The saving of each workstream is outlined below, with real-life  
57  
58 88 equivalent values detailed in table 1 (7).  
59  
60

89

90 **Table 1:** Table summarising the net CO<sub>2</sub>e saving for each workstream and real-life equivalent values

91 (7)

| Workstream          | Net CO <sub>2</sub> e saving | Original method as per grant application                                                                                                                      | Adaptations implemented                                                                                                                                      | Real-life equivalent value |
|---------------------|------------------------------|---------------------------------------------------------------------------------------------------------------------------------------------------------------|--------------------------------------------------------------------------------------------------------------------------------------------------------------|----------------------------|
| <b>Workstream 1</b> | 12 tonnes                    | Face-to-face trial management, oversight committee, patient experience, site feasibility and study launch meetings.                                           | Virtual trial management, oversight committee, patient experience, site feasibility and study launch meetings. Queries and actions resolved via email.       | Driving 37,015 km in a car |
| <b>Workstream 2</b> | 20 tonnes                    | In-person observations; real-time field notes; face-to-face interviews; regular researcher travel to base hospitals and satellite haemodialysis units.        | 'Photovoice'; virtual interviews; reduced researcher travel to base hospitals and satellite haemodialysis units.                                             | Driving 61,692 km in a car |
| <b>Workstream 3</b> | 0.32 tonnes                  | Face-to-face interviews; in-person attendance at, and observations of, trial management, investigator and site initiation meetings; face-to-face provision of | Virtual interviews; remote attendance at, and observations of, trial management, investigator and site initiation meetings; virtual provision of feedback to | Driving 987 km in a car    |

|                       |            |                                                           |                                                     |                                |
|-----------------------|------------|-----------------------------------------------------------|-----------------------------------------------------|--------------------------------|
|                       |            | feedback to<br>'recruiters' at<br>participating units.    | 'recruiters' at<br>participating units.             |                                |
| <b>Other benefits</b> | 104 tonnes | In-person<br>conference<br>attendance; onsite<br>working. | Virtual conference<br>attendance; home-<br>working. | Driving 624,000<br>km in a car |
| <b>Total</b>          | 136 tonnes | -                                                         | -                                                   | Driving 419,503<br>km in a car |

92

### 93 **Workstream 1**

94 The net saving for workstream 1 was 12 tonnes of CO<sub>2</sub>e (emissions saved 12 tonnes; emissions used  
95 0). Key savings were related to travel due to online reconfiguration of study meetings, UK-wide site  
96 visits.

97

### 98 **Workstream 2**

99 The net saving for workstream 2 was 20 tonnes of CO<sub>2</sub>e (total emissions saved 20 tonnes; emissions  
100 used 0.74 tonnes). 50% of participants opted for virtual interviews/'photovoice' in place of  
101 traditional ethnographic methods such as face-to-face semi-structured interviews. Subsequently,  
102 researcher travel to base hospitals and satellite haemodialysis units was also reduced by 50%. The  
103 purchase of a smartphone and two electronic tablets incurred 0.74 tonnes of CO<sub>2</sub>e.

104

### 105 **Workstream 3**

106 The net saving for workstream 3 was 0.32 tonnes of CO<sub>2</sub>e (total emissions saved 0.32; emissions  
107 used 0). Researcher travel was reduced by 100% as semi-structured interviews, attendance and  
108 observations of, trial management meetings, investigator meetings and site visits, and provision of  
109 feedback regarding recruitment to participating units were completed remotely.

110

60



### 111 **Cost savings**

112 All adaptations to the study organisation, management and design were made within the original  
113 study budget and resulted in significant cost savings. This included costs for travel, consumables and  
114 researcher time. In the first 18 months, the estimated total travel saving was £9,659 across all  
115 workstreams, meaning 93% of the travel budget (£10,391) and 24% of the entire non-staff costs  
116 (£40,603) were saved. The underspend was repurposed for researcher training, participant benefit  
117 and further opportunities for scientific communication (conference attendance and publication open  
118 access dissemination costs) following funder approval.

### 120 **Other benefits**

121 Additional CO<sub>2</sub>e savings were incurred through virtual attendance at national and international  
122 conferences and reduced travel due to home-working, saving 71 tonnes and 33 tonnes of CO<sub>2</sub>e  
123 respectively across all workstreams. Virtual patient experience activities resulted in geographical and  
124 ethnic diversity of group members as individuals joined from various locations across the UK (see  
125 figure 1).

### 127 **The value of this experience**

128 To date, adaptations to the management of the NightLife study have resulted in a net saving of 136  
129 tonnes of CO<sub>2</sub>e. Key savings were related to travel due to reconfiguration of study meetings, UK-  
130 wide site visits. Extrapolating these data forward will lead to further increases in savings over the  
131 five year study period based on a hybrid approach now that restrictions have been lifted.

133 The benefits of the NightLife study adaptations go beyond the positive environmental impact.

134 Interestingly, 50% of participants opted for virtual interviews and/or 'photovoice' in place of face-to-  
135 face semi-structured interviews, which revealed a holistic insight into the lived experience of  
136 haemodialysis. Photovoice allowed the researcher to approach the observational element

1  
2  
3 137 differently, allowing participants to lead data collection and extend it into their home life; the  
4  
5 138 experience of haemodialysis is a constant life disruption, not limited to the time spent in the clinical  
6  
7 139 environment. This added richness in findings that may not have been achieved with traditional  
8  
9  
10 140 ethnographic methods alone.

11  
12 141  
13  
14 142 All adaptations to the study organisation, management and design were made within the original  
15  
16 143 study budget and resulted in significant cost savings which were repurposed following funder  
17  
18 144 approval. Additional CO<sub>2</sub>e savings were incurred through virtual attendance at national and  
19  
20 145 international conferences and reduced travel due to home-working.

21  
22  
23 146  
24  
25 147 Teleconferencing, video-conferencing and web-based training materials were proven to be effective.  
26  
27 148 The inaugural investigator meeting was held entirely remotely with more than 40 attendees from  
28  
29 149 the research and nephrology community across the UK. The virtual nature of trial management and  
30  
31 150 oversight committee meetings allowed more flexibility for meeting attendance, particularly for  
32  
33 151 committee members based abroad. Indeed, the frequency of these meetings was increased to  
34  
35 152 support the ongoing oversight of the study at no additional cost. However, there is room and need  
36  
37 153 for hybrid approaches to some clinical trial activities, with an acceptance of some CO<sub>2</sub>e.

38  
39 154  
40  
41  
42  
43 155 Debates are ongoing about how to incorporate a diverse range of patient voices in the design and  
44  
45 156 delivery of research, highlighting a lack of diversity and inclusion (8). The use of alternative meeting  
46  
47 157 techniques as part of the NightLife study resulted in both geographical and ethnic diversity of the  
48  
49 158 patient experience group, enriching the feedback of the lived experience of kidney disease and  
50  
51 159 haemodialysis.

52  
53 160  
54  
55  
56  
57 161 The findings of our work are supported by a retrospective analysis of 12 pragmatic randomised  
58  
59 162 control trials (9); emissions are often generated in areas where steps could be taken to reduce them,  
60

1  
2  
3 163 such as travel and trial conduct. Resistance to such changes, however, is common. Trial-related  
4  
5 164 travel is often comprised of heavy emissions (particularly where multi-centre studies are concerned).  
6  
7 165 Traditionally this has included travel to site visits across the UK (by rail and road), as well as  
8  
9 166 investigator meetings which often include international travel (by air), oversight committee  
10  
11 167 meetings, training, onsite monitoring and closedown visits, as well as conference attendance  
12  
13 168 throughout the study's duration. These are travel related activities that most Clinical Trials Units  
14  
15 169 (CTUs) cost for when considering the generation of a trial grant. This is generally done by aligning  
16  
17 170 activities and associated costs with the risk of study. For example, clinical trials of investigational  
18  
19 171 medicinal products (CTIMPs) are deemed higher risk, therefore onsite monitoring of participating  
20  
21 172 sites and pharmacies and resulting travel is a necessity. However, where trials are not bound by such  
22  
23 173 strict legislation, COVID-19 has presented an opportunity to change these practices in a way that  
24  
25 174 reduces the trial's carbon footprint, as reflected by our changes in the NightLife study.  
26  
27  
28  
29  
30  
31

32 176 Typically, most CTUs continue to utilise paper Investigator Site Files (ISFs). However, this approach to  
33  
34 177 trial organisation and data management is being challenged and there is widespread recognition  
35  
36 178 from the research community for significant improvements in environmental sustainability within  
37  
38 179 clinical trials (10) . There are many ways to reduce waste with increasing scope to switch from paper  
39  
40 180 to electronic trial management systems (e.g. ISFs) in order to (i) minimise paper usage and storage  
41  
42 181 requirements; (ii) increase document accessibility; (iii) streamline management, monitoring and  
43  
44 182 archiving of multi-centre clinical trials and; (iv) reduce monetary costs. Adshead *et al* suggest that  
45  
46 183 clinical trials with a lower carbon footprint should be prioritised by funders, and just as researchers  
47  
48 184 have to justify to funders the budget for a trial, they should also have to justify the carbon footprint  
49  
50 185 to their stakeholders and demonstrate that it as low as possible (10).  
51  
52  
53  
54  
55

56 186

### 57 187 **An aid for future trial design and further work**

58  
59  
60

1  
2  
3 188 To the authors' knowledge, this is one of few articles to consider and evaluate the environmental  
4  
5 189 improvements that can be made by remote working and virtual adaptations to study designs when  
6  
7 190 establishing multi-centre RCTs. This work has the potential to act as a guide for other clinical trials to  
8  
9 191 reduce cost and their environmental impact. It also demonstrates how to enhance geographical  
10  
11 192 diversity of research teams without excessive cost.  
12  
13

14 193

15  
16 194 **Take home messages**

17  
18 195 The COVID-19 pandemic presented a need to adapt clinical trials to protect patients, carers, clinical  
19  
20 196 teams and researchers, and accelerated a pre-existing drive to reduce the carbon footprint of  
21  
22 197 research. Study processes needed to evolve rapidly to ensure they were robust and financially lean  
23  
24 198 in the COVID-19 era. The legacy of such changes has been wide ranging but of note, the impact on  
25  
26 199 CO<sub>2e</sub> saving experienced in the NightLife study is a benefit that should inspire and drive the  
27  
28 200 reduction of the carbon impact of all clinical trials from now and into the future. We have  
29  
30 201 highlighted opportunities for investigators and trial management teams to implement alternative  
31  
32 202 approaches to designing and conducting clinical trials in order to make them less carbon intensive,  
33  
34 203 more environmentally sustainable and better value for money.  
35  
36  
37  
38  
39  
40  
41  
42  
43  
44  
45  
46  
47  
48  
49  
50  
51  
52  
53  
54  
55  
56  
57  
58  
59  
60

1  
2  
3 205  
4 206 **Contributors**

5 207 The paper was conceived by NQ and JB. SB performed the carbon footprint calculations. NQ, JB, KH,  
6  
7 208 VC, CR, KM, CC, LR and HE reviewed and approved the final draft submitted.  
9

10 209

11  
12 210 **Funding**

13  
14 211 The NightLife study is funded by the National Institute for Health and Care Research (NIHR) Health  
15  
16 212 Technology Assessment (HTA) programme (funder reference: NIHR127440). The views expressed are  
17  
18 213 those of the author(s) and not necessarily those of the NIHR or the Department of Health and Social  
19  
20 214 Care.  
21  
22

23 215

24  
25 216 **Competing interests**

26  
27  
28 217 None declared.  
29

30 218

31  
32 219 **Patient consent**

33  
34 220 Not required.  
35  
36

37 221

38  
39 222 **Provenance and peer review**

40  
41 223 Not commissioned; externally peer reviewed.  
42  
43

44 224

45  
46 225 **Data availability statement**

47  
48 226 No additional data available.  
49  
50  
51  
52  
53  
54  
55  
56  
57  
58  
59  
60

227 **References**

- 1  
2  
3  
4  
5  
6  
7  
8  
9  
10  
11  
12  
13  
14  
15  
16  
17  
18  
19  
20  
21  
22  
23  
24  
25  
26  
27  
28  
29  
30  
31  
32  
33  
34  
35  
36  
37  
38  
39  
40  
41  
42  
43  
44  
45  
46  
47  
48  
49  
50  
51  
52  
53  
54  
55  
56  
57  
58  
59  
60
- 228 1. Mitchell EJ, Ahmed K, Breeman S, Cotton S, Constable L, Ferry G, et al. It is unprecedented:  
229 trial management during the COVID-19 pandemic and beyond. *Trials*. 2020;21(1):784.
  - 230 2. Ltd BC. ISRCTN registry - Does NIGHT-time dialysis improve quality of LIFE? [Available from:  
231 <https://www.isrctn.com/ISRCTN87042063>.
  - 232 3. NightLife. The NightLife study [Available from: <https://nightlifestudy.co.uk/>.
  - 233 4. Donovan JL, Rooshenas L, Jepson M, Elliott D, Wade J, Avery K, et al. Optimising recruitment  
234 and informed consent in randomised controlled trials: the development and implementation of the  
235 Quintet Recruitment Intervention (QRI). *Trials*. 2016;17(1):283.
  - 236 5. Cluley V. Using photovoice to include people with profound and multiple learning disabilities  
237 in inclusive research. *British Journal of Learning Disabilities*. 2017;45(1):39-46.
  - 238 6. Cluley V, Pilnick A, Fyson R. Improving the inclusivity and credibility of visual research:  
239 interpretive engagement as a route to including the voices of people with learning disabilities in  
240 analysis. *Visual Studies*. 2021;36(4-5):524-36.
  - 241 7. Carbon Calculator - Carbon Footprint Calculator For Individuals And Households [Available  
242 from: <https://www.carbonfootprint.com/calculator.aspx>.
  - 243 8. Tierney S, Dawson S, Boylan A-M, Richards G, Park S, Turk A, et al. Broadening diversity  
244 through creative involvement to identify research priorities. *Research Involvement and Engagement*.  
245 2021;7(1):1-10.
  - 246 9. Lyle K, Dent L, Bailey S, Kerridge L, Roberts I, Milne R. Carbon cost of pragmatic randomised  
247 controlled trials: retrospective analysis of sample of trials. *BMJ*. 2009;339.
  - 248 10. Adshead F, Salman RA-S, Aumonier S, Collins M, Hood K, McNamara C, et al. A strategy to  
249 reduce the carbon footprint of clinical trials. *The Lancet*. 2021;398(10297):281-2.
  - 250

1  
2  
3 251 **Figures**  
4

5 252 Figure 1: Map of UK showing geographical locations of patient experience group members  
6

7 253

8 254 **Tables**

9 255

10 256 Table 1: Table summarising the net CO<sub>2</sub>e saving for each workstream and real-life equivalent values  
11  
12  
13  
14  
15  
16  
17  
18  
19  
20  
21  
22  
23  
24  
25  
26  
27  
28  
29  
30  
31  
32  
33  
34  
35  
36  
37  
38  
39  
40  
41  
42  
43  
44  
45  
46  
47  
48  
49  
50  
51  
52  
53  
54  
55  
56  
57  
58  
59  
60

For peer review only

1  
2  
3  
4  
5  
6  
7  
8  
9  
10  
11  
12  
13  
14  
15  
16  
17  
18  
19  
20  
21  
22  
23  
24  
25  
26  
27  
28  
29  
30  
31  
32  
33  
34  
35  
36  
37  
38  
39  
40  
41  
42  
43  
44  
45  
46  
47  
48  
49  
50  
51  
52  
53

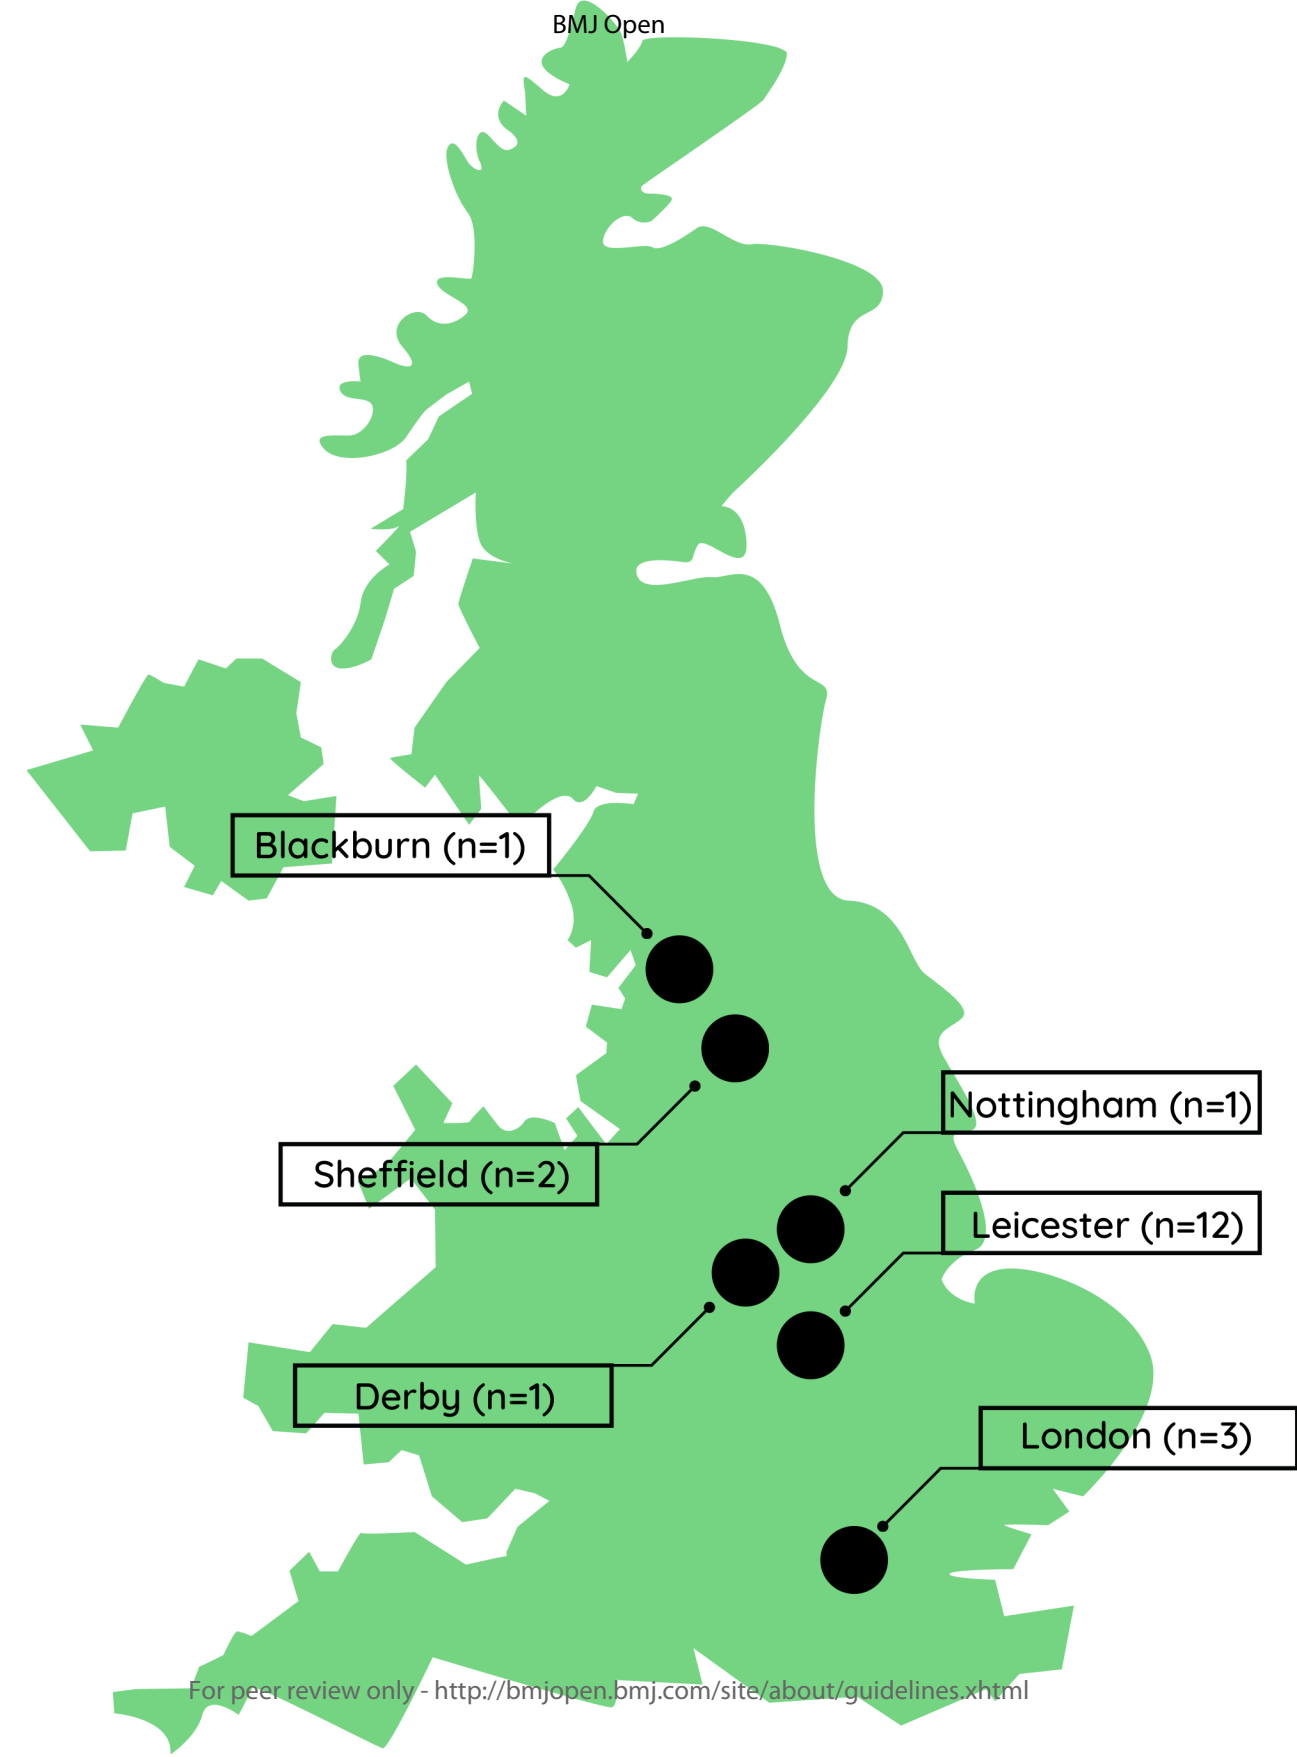



# BMJ Open

## Reducing the carbon footprint of research: experience from the NightLife study

|                                 |                                                                                                                                                                                                                                                                                                                                                                                                                                                                                                                                                                                                                                                                                                                                                                                                                                                                                                                                                                                                                                                                                                                                                                                                                                                                     |
|---------------------------------|---------------------------------------------------------------------------------------------------------------------------------------------------------------------------------------------------------------------------------------------------------------------------------------------------------------------------------------------------------------------------------------------------------------------------------------------------------------------------------------------------------------------------------------------------------------------------------------------------------------------------------------------------------------------------------------------------------------------------------------------------------------------------------------------------------------------------------------------------------------------------------------------------------------------------------------------------------------------------------------------------------------------------------------------------------------------------------------------------------------------------------------------------------------------------------------------------------------------------------------------------------------------|
| Journal:                        | <i>BMJ Open</i>                                                                                                                                                                                                                                                                                                                                                                                                                                                                                                                                                                                                                                                                                                                                                                                                                                                                                                                                                                                                                                                                                                                                                                                                                                                     |
| Manuscript ID                   | bmjopen-2022-070200.R3                                                                                                                                                                                                                                                                                                                                                                                                                                                                                                                                                                                                                                                                                                                                                                                                                                                                                                                                                                                                                                                                                                                                                                                                                                              |
| Article Type:                   | Communication                                                                                                                                                                                                                                                                                                                                                                                                                                                                                                                                                                                                                                                                                                                                                                                                                                                                                                                                                                                                                                                                                                                                                                                                                                                       |
| Date Submitted by the Author:   | 03-Mar-2023                                                                                                                                                                                                                                                                                                                                                                                                                                                                                                                                                                                                                                                                                                                                                                                                                                                                                                                                                                                                                                                                                                                                                                                                                                                         |
| Complete List of Authors:       | <p>Quann, Niamh; University of Leicester, Leicester Clinical Trials Unit, College of Life Sciences<br/> Burns, Steph; University Hospitals of Leicester NHS Trust<br/> Hull, Katherine; University of Leicester, Department of Cardiovascular Sciences, College of Life Sciences; University Hospitals of Leicester NHS Trust, John Walls Renal Unit, Leicester General Hospital<br/> Cluley, Victoria; University of Nottingham, School of Sociology and Social Policy<br/> Richardson, Carla; University of Leicester, Leicester Clinical Trials Unit, College of Life Sciences<br/> MacConaill, Kateryna; University Hospitals of Leicester NHS Trust, John Walls Renal Unit, Leicester General Hospital<br/> Conefrey, Carmel; University of Bristol Medical School, Bristol Population Health Science Institute<br/> Rooshenas, Leila; University of Bristol, Bristol Population Health Science Institute, Bristol Medical School<br/> Eborall, Helen; University of Edinburgh , Usher Institute, College of Medicine and Veterinary Medicine<br/> Burton, James; University of Leicester, Department of Cardiovascular Sciences, College of Life Sciences; University Hospitals of Leicester NHS Trust, John Walls Renal Unit, Leicester General Hospital</p> |
| <b>Primary Subject Heading</b>: | Renal medicine                                                                                                                                                                                                                                                                                                                                                                                                                                                                                                                                                                                                                                                                                                                                                                                                                                                                                                                                                                                                                                                                                                                                                                                                                                                      |
| Secondary Subject Heading:      | Research methods                                                                                                                                                                                                                                                                                                                                                                                                                                                                                                                                                                                                                                                                                                                                                                                                                                                                                                                                                                                                                                                                                                                                                                                                                                                    |
| Keywords:                       | Nephrology < INTERNAL MEDICINE, NEPHROLOGY, Dialysis < NEPHROLOGY, End stage renal failure < NEPHROLOGY, Quality of Life                                                                                                                                                                                                                                                                                                                                                                                                                                                                                                                                                                                                                                                                                                                                                                                                                                                                                                                                                                                                                                                                                                                                            |
|                                 |                                                                                                                                                                                                                                                                                                                                                                                                                                                                                                                                                                                                                                                                                                                                                                                                                                                                                                                                                                                                                                                                                                                                                                                                                                                                     |

SCHOLARONE™  
Manuscripts



I, the Submitting Author has the right to grant and does grant on behalf of all authors of the Work (as defined in the below author licence), an exclusive licence and/or a non-exclusive licence for contributions from authors who are: i) UK Crown employees; ii) where BMJ has agreed a CC-BY licence shall apply, and/or iii) in accordance with the terms applicable for US Federal Government officers or employees acting as part of their official duties; on a worldwide, perpetual, irrevocable, royalty-free basis to BMJ Publishing Group Ltd ("BMJ") its licensees and where the relevant Journal is co-owned by BMJ to the co-owners of the Journal, to publish the Work in BMJ Open and any other BMJ products and to exploit all rights, as set out in our [licence](#).

The Submitting Author accepts and understands that any supply made under these terms is made by BMJ to the Submitting Author unless you are acting as an employee on behalf of your employer or a postgraduate student of an affiliated institution which is paying any applicable article publishing charge ("APC") for Open Access articles. Where the Submitting Author wishes to make the Work available on an Open Access basis (and intends to pay the relevant APC), the terms of reuse of such Open Access shall be governed by a Creative Commons licence – details of these licences and which [Creative Commons](#) licence will apply to this Work are set out in our licence referred to above.

Other than as permitted in any relevant BMJ Author's Self Archiving Policies, I confirm this Work has not been accepted for publication elsewhere, is not being considered for publication elsewhere and does not duplicate material already published. I confirm all authors consent to publication of this Work and authorise the granting of this licence.

1  
2  
3 **1 Reducing the carbon footprint of research: experience from the NightLife study**

4  
5 2 Niamh Quann<sup>1</sup>, Steph Burns<sup>2</sup>, Katherine L Hull<sup>3,4</sup>, Victoria Cluley<sup>3</sup>, Carla Richardson<sup>1</sup>, Kateryna  
6  
7 3 MacConaill<sup>3,4</sup>, Carmel Conefrey<sup>5</sup>, Leila Rooshenas<sup>5</sup>, Helen Eborall<sup>6</sup>, James O Burton<sup>3,4,7</sup> on behalf of  
8  
9 4 the NightLife Study Team

10  
11  
12 5  
13  
14 6 <sup>1</sup>Leicester Clinical Trials Unit, College of Life Sciences, University of Leicester, Leicester, UK

15  
16 7 <sup>2</sup>University Hospitals of Leicester NHS Trust, Leicester, UK

17  
18 8 <sup>3</sup>Department of Cardiovascular Sciences, College of Life Sciences, University of Leicester, Leicester,  
19  
20 9 UK

21  
22  
23 10 <sup>4</sup>John Walls Renal Unit, Leicester General Hospital, University Hospitals of Leicester NHS Trust,  
24  
25 11 Leicester, UK

26  
27 12 <sup>5</sup>Population Health Sciences, Bristol Medical School, University of Bristol, UK

28  
29 13 <sup>6</sup>Usher Institute, College of Medicine and Veterinary Medicine, University of Edinburgh

30  
31 14 <sup>7</sup>School of Sport, Exercise and Health Sciences, Loughborough University, Loughborough, UK

32  
33  
34 15

35  
36  
37 16 **Correspondence to:**

38  
39 17 Niamh Quann

40  
41 18 Leicester Clinical Trials Unit, College of Life Sciences, University of Leicester, University Road,  
42  
43 19 Leicester, LE1 7RH, UK

44  
45 20 [nq8@le.ac.uk](mailto:nq8@le.ac.uk)

46  
47  
48 21

49  
50 22 **Keywords:** Carbon footprint, CO<sub>2</sub>e emissions, climate change, environmental sustainability, carbon  
51  
52 23 reduction, carbon impact, clinical trials, trial conduct, randomised controlled trial

53  
54  
55 24

1  
2  
3 25 **Abstract**  
4

5 26 As set out in the Climate Change Act (2008), the UK National Health Service (NHS) has made a  
6  
7 27 commitment to halve greenhouse gas emissions by 2025 and reach net-zero by 2050. Research  
8  
9 28 forms a core part of NHS activity and reducing the carbon footprint of clinical trials is a core element  
10  
11 29 of the National Institute for Health and Care Research (NIHR) Carbon Reduction Strategy (2019).  
12  
13  
14 30 However, support from funding organisations on how to achieve these targets is lacking. This brief  
15  
16 31 Communication article reports the reduction in the carbon footprint of the NightLife study, an  
17  
18 32 ongoing multicentre randomised controlled trial assessing the impact of in-centre nocturnal  
19  
20 33 haemodialysis on quality of life. By using remote conferencing software and innovative data  
21  
22 34 collection methods, we demonstrated a total saving of 136 tonnes of carbon dioxide equivalent over  
23  
24 35 three workstreams during the first 18 months of the study, following grant activation on Jan 1<sup>st</sup>,  
25  
26 36 2020. In addition to the environmental impact, there were additional benefits seen to cost as well as  
27  
28 37 increased participant diversity and inclusion. This work highlights ways in which trials could be made  
29  
30 38 less carbon intensive, more environmentally sustainable and better value for money.  
31  
32  
33  
34  
35  
36  
37  
38  
39  
40  
41  
42  
43  
44  
45  
46  
47  
48  
49  
50  
51  
52  
53  
54  
55  
56  
57  
58  
59  
60

## 39 **Introduction**

40 The social distancing restrictions implemented during the COVID-19 pandemic had a significant  
41 impact on the delivery and conduct of health research in the UK. Trial management teams played a  
42 key role in rapidly adjusting the way clinical trials were designed and undertaken (1). Although  
43 reductions in the carbon footprint of research activities were not the driving force for the changes  
44 required during the pandemic, it was nevertheless a significant and positive outcome. It is important  
45 that, where possible, clinical trials use these approaches to ensure carbon dioxide equivalent (CO<sub>2</sub>e)  
46 savings and demonstrate an ongoing, responsible commitment to sustainability.

## 48 **Overview of the NightLife study**

49 The NightLife study is an ongoing randomised controlled trial (RCT) using mixed methods to assess  
50 the clinical and cost effectiveness of thrice weekly, extended hours, in-centre nocturnal  
51 haemodialysis in comparison to standard care (ISRCTN87042063(2); see study website(3)),. The  
52 study includes three main workstreams: an RCT and internal pilot (workstream 1), an ongoing  
53 process evaluation (workstream 2) and a QuinteT Recruitment Intervention (QRI, workstream 3) (4).

## 55 **Adjustments to the NightLife study delivery in response to the COVID-19 pandemic**

56 Prior to the COVID-19 pandemic, it was planned to conduct all meetings and qualitative study  
57 elements in a face-to-face manner by ≥20 collaborators across the UK. This included in-person study  
58 launch and oversight committee meetings. Following UK Government instruction, staff worked from  
59 home wherever possible. All meetings, including trial management, oversight committee, patient  
60 experience and site feasibility were reconfigured and held online. Queries and outstanding actions  
61 were resolved via email correspondence. While study processes were conducted remotely, the  
62 patient population (adults receiving thrice weekly in-centre haemodialysis) enabled in-person  
63 recruitment for workstream 2, however all qualitative data was collected remotely. Workstream 1

1  
2  
3 64 and workstream 3 (which were due to run in parallel) were paused for nine months due to the  
4  
5 65 impact of COVID-19 on research delivery.  
6  
7  
8 66

9  
10 67 Qualitative data collection through ethnographic methods (in-person observations and real-time  
11  
12 68 field notes) and interviews with the research team, dialysis unit staff and individuals with kidney  
13  
14 69 disease were paused and additional data collection techniques were considered to reduce face-to-  
15  
16 70 face contact. This included virtual interviews using common conference software programmes and  
17  
18  
19 71 'photovoice'; a participatory research method that utilises participant-led photography of the  
20  
21 72 phenomena being researched (in this case, the lived experience of haemodialysis) and allows remote  
22  
23 73 access to experiences and phenomena outside of the immediate field of study (5, 6).  
24  
25  
26 74

#### 27 28 75 **Calculation of carbon footprint**

29  
30 76 The original grant application outlined the total number of planned face-to-face meetings and  
31  
32 77 related costings for the duration of the study. This was used to map the study activities which were  
33  
34 78 reconfigured to virtual methods. Using a web-based carbon footprint calculator (7), the CO<sub>2</sub>e saved  
35  
36 79 by converting to virtual approaches, home working and alternative qualitative data collection  
37  
38  
39 80 techniques were estimated. The calculator took into account: travel modality (rail, car, bicycle, air  
40  
41 81 travel), specific features such as vehicle and fuel type, number of people travelling and distance in  
42  
43 82 miles. For air travel, airport codes and flight class were considered. Estimated CO<sub>2</sub>e savings were  
44  
45 83 calculated over the first 18 months of the NightLife study.  
46  
47  
48 84

#### 49 50 85 **What have we learnt?**

##### 51 52 86 ***Carbon reduction***

53  
54 87 To date, innovative changes to the management of the NightLife study have resulted in an estimated  
55  
56 88 net CO<sub>2</sub>e saving of 136 tonnes. The saving of each workstream is outlined below, with real-life  
57  
58  
59 89 equivalent values detailed in table 1 (7).  
60

90

91 **Table 1.** Table summarising the net CO<sub>2</sub>e saving for each workstream and equivalent kilometres

92 driven in a car (7)

| Workstream          | Net CO <sub>2</sub> e saving | Original method as per grant application                                                                                                               | Adaptations implemented                                                                                                                                | Equivalent kilometres driven in a standard (non-electric) car |
|---------------------|------------------------------|--------------------------------------------------------------------------------------------------------------------------------------------------------|--------------------------------------------------------------------------------------------------------------------------------------------------------|---------------------------------------------------------------|
| <b>Workstream 1</b> | 12 tonnes                    | Face-to-face trial management, oversight committee, patient experience, site feasibility and study launch meetings.                                    | Virtual trial management, oversight committee, patient experience, site feasibility and study launch meetings. Queries and actions resolved via email. | 37,015 km                                                     |
| <b>Workstream 2</b> | 20 tonnes                    | In-person observations; real-time field notes; face-to-face interviews; regular researcher travel to base hospitals and satellite haemodialysis units. | 'Photovoice'; virtual interviews; reduced researcher travel to base hospitals and satellite haemodialysis units.                                       | 61,692 km                                                     |
| <b>Workstream 3</b> | 0.32 tonnes                  | Face-to-face interviews; in-person attendance at, and observations of, trial management, investigator and site initiation meetings; face-to-face       | Virtual interviews; remote attendance at, and observations of, trial management, investigator and site initiation meetings; virtual provision of       | 987 km                                                        |

|                       |            |                                                                        |                                                        |            |
|-----------------------|------------|------------------------------------------------------------------------|--------------------------------------------------------|------------|
|                       |            | provision of<br>feedback to<br>'recruiters' at<br>participating units. | feedback to<br>'recruiters' at<br>participating units. |            |
| <b>Other benefits</b> | 104 tonnes | In-person<br>conference<br>attendance; onsite<br>working.              | Virtual conference<br>attendance; home-<br>working.    | 624,000 km |
| <b>Total</b>          | 136 tonnes | -                                                                      | -                                                      | 419,503 km |

93

#### 94 **Workstream 1**

95 The net saving for workstream 1 was 12 tonnes of CO<sub>2</sub>e (emissions saved 12 tonnes; emissions used  
96 0). Key savings were related to travel due to online reconfiguration of study meetings, UK-wide site  
97 visits.

98

#### 99 **Workstream 2**

100 The net saving for workstream 2 was 20 tonnes of CO<sub>2</sub>e (total emissions saved 20 tonnes; emissions  
101 used 0.74 tonnes). 50% of participants opted for virtual interviews/'photovoice' in place of  
102 traditional ethnographic methods such as face-to-face semi-structured interviews. Subsequently,  
103 researcher travel to base hospitals and satellite haemodialysis units was also reduced by 50%. The  
104 purchase of a smartphone and two electronic tablets incurred 0.74 tonnes of CO<sub>2</sub>e.

105

#### 106 **Workstream 3**

107 The net saving for workstream 3 was 0.32 tonnes of CO<sub>2</sub>e (total emissions saved 0.32; emissions  
108 used 0). Researcher travel was reduced by 100% as semi-structured interviews, attendance and  
109 observations of, trial management meetings, investigator meetings and site visits, and provision of  
110 feedback regarding recruitment to participating units were completed remotely.

111



### 112 **Cost savings**

113 All adaptations to the study organisation, management and design were made within the original  
114 study budget and resulted in significant cost savings. This included costs for travel, consumables and  
115 researcher time. In the first 18 months, the estimated total travel saving was £9,659 across all  
116 workstreams, meaning 93% of the travel budget (£10,391) and 24% of the entire non-staff costs  
117 (£40,603) were saved. The underspend was repurposed for researcher training, participant benefit  
118 and further opportunities for scientific communication (conference attendance and publication open  
119 access dissemination costs) following funder approval.

120

### 121 **Other benefits**

122 Additional CO<sub>2</sub>e savings were incurred through virtual attendance at national and international  
123 conferences and reduced travel due to home-working, saving 71 tonnes and 33 tonnes of CO<sub>2</sub>e  
124 respectively across all workstreams. Virtual patient experience activities resulted in geographical and  
125 ethnic diversity of group members as individuals joined from various locations across the UK (see  
126 figure 1).

127

### 128 **The value of this experience**

129 To date, adaptations to the management of the NightLife study have resulted in a net saving of 136  
130 tonnes of CO<sub>2</sub>e. Key savings were related to travel due to reconfiguration of study meetings, UK-  
131 wide site visits. Extrapolating these data forward will lead to further increases in savings over the  
132 five-year study period based on a hybrid approach now that restrictions have been lifted.

133

134 The benefits of the NightLife study adaptations go beyond the positive environmental impact.

135 Interestingly, 50% of participants opted for virtual interviews and/or 'photovoice' in place of face-to-  
136 face semi-structured interviews, which revealed a holistic insight into the lived experience of  
137 haemodialysis. Photovoice allowed the researcher to approach the observational element

1  
2  
3 138 differently, allowing participants to lead data collection and extend it into their home life; the  
4  
5 139 experience of haemodialysis is a constant life disruption, not limited to the time spent in the clinical  
6  
7 140 environment. This added richness in findings that may not have been achieved with traditional  
8  
9 141 ethnographic methods alone.  
10  
11  
12 142

13  
14 143 All adaptations to the study organisation, management and design were made within the original  
15  
16 144 study budget and resulted in significant cost savings which were repurposed following funder  
17  
18 145 approval. Additional CO<sub>2</sub>e savings were incurred through virtual attendance at national and  
19  
20 146 international conferences and reduced travel due to home-working.  
21  
22

23 147  
24  
25 148 Teleconferencing, video-conferencing and web-based training materials were found to be effective.  
26  
27 149 The inaugural investigator meeting was held entirely remotely with more than 40 attendees from  
28  
29 150 the research and nephrology community across the UK. The virtual nature of trial management and  
30  
31 151 oversight committee meetings allowed more flexibility for meeting attendance, particularly for  
32  
33 152 committee members based abroad. Indeed, the frequency of these meetings was increased to  
34  
35 153 support the ongoing oversight of the study at no additional cost. However, an objective assessment  
36  
37 154 of the impact of remote working and study activities is beyond the scope of this work. As we move  
38  
39 155 away from the COVID-19 lockdown era, there is room and need for hybrid approaches to various  
40  
41 156 clinical trial activities, with an acceptance of some CO<sub>2</sub>e emissions.  
42  
43  
44  
45

46 157  
47  
48 158 Debates are ongoing about how to incorporate a diverse range of patient voices in the design and  
49  
50 159 delivery of research, highlighting a lack of diversity and inclusion (8). The use of alternative meeting  
51  
52 160 techniques as part of the NightLife study resulted in both geographical and ethnic diversity of the  
53  
54 161 patient experience group, enriching the feedback of the lived experience of kidney disease and  
55  
56 162 haemodialysis.  
57  
58

59 163  
60

1  
2  
3 164 The findings of our work are supported by a retrospective analysis of 12 pragmatic randomised  
4  
5 165 control trials (9); emissions are often generated in areas where steps could be taken to reduce them,  
6  
7 166 such as travel and trial conduct. Resistance to such changes, however, is common. Trial-related  
8  
9  
10 167 travel is often comprised of heavy emissions (particularly where multicentre studies are concerned).  
11  
12 168 Traditionally this has included travel to site visits across the UK (by rail and road), as well as  
13  
14 169 investigator meetings which often include international travel (by air), oversight committee  
15  
16 170 meetings, training, onsite monitoring and closedown visits, as well as conference attendance  
17  
18  
19 171 throughout the study's duration. These are travel related activities that most Clinical Trials Units  
20  
21 172 (CTUs) cost for when considering the generation of a trial grant. This is generally done by aligning  
22  
23 173 activities and associated costs with the risk of study. For example, clinical trials of investigational  
24  
25 174 medicinal products (CTIMPs) are deemed higher risk, therefore onsite monitoring of participating  
26  
27  
28 175 sites and pharmacies and resulting travel is a necessity. However, where trials are not bound by such  
29  
30 176 strict legislation, COVID-19 has presented an opportunity to change these practices in a way that  
31  
32 177 reduces the trial's carbon footprint, as reflected by our changes in the NightLife study.  
33  
34  
35 178  
36  
37 179 Typically, most CTUs continue to utilise paper Investigator Site Files (ISFs). However, this approach to  
38  
39 180 trial organisation and data management is being challenged and there is widespread recognition  
40  
41 181 from the research community for significant improvements in environmental sustainability within  
42  
43 182 clinical trials (10) . There are many ways to reduce waste with increasing scope to switch from paper  
44  
45 183 to electronic trial management systems (e.g. ISFs) in order to (i) minimise paper usage and storage  
46  
47 184 requirements; (ii) increase document accessibility; (iii) streamline management, monitoring and  
48  
49  
50 185 archiving of multicentre clinical trials and; (iv) reduce monetary costs. Adshead *et al* suggest that  
51  
52 186 clinical trials with a lower carbon footprint should be prioritised by funders, and just as researchers  
53  
54 187 have to justify to funders the budget for a trial, they should also have to justify the carbon footprint  
55  
56  
57 188 to their stakeholders and demonstrate that it as low as possible (10).  
58  
59 189  
60

1  
2  
3 **190 An aid for future trial design and further work**  
4

5 191 To the authors' knowledge, this is one of few articles to consider and evaluate the environmental  
6  
7 192 improvements that can be made by remote working and virtual adaptations to study designs when  
8  
9 193 establishing multicentre RCTs. This work has the potential to act as a guide for other clinical trials to  
10  
11 194 reduce cost and their environmental impact. It also demonstrates how to enhance geographical  
12  
13 195 diversity of research teams without excessive cost.  
14  
15  
16  
17 196

18  
19 **197 Take-home messages**  
20

21 198 The COVID-19 pandemic presented a need to adapt clinical trials to protect patients, carers, clinical  
22  
23 199 teams and researchers, and accelerated a pre-existing drive to reduce the carbon footprint of  
24  
25 200 research. Study processes needed to evolve rapidly to ensure they were robust and financially lean  
26  
27 201 in the COVID-19 era. The legacy of such changes has been wide ranging but of note, the impact on  
28  
29 202 CO<sub>2</sub>e saving experienced in the NightLife study is a benefit that should inspire and drive the  
30  
31 203 reduction of the carbon impact of all clinical trials from now and into the future. We have  
32  
33 204 highlighted opportunities for investigators and trial management teams to implement alternative  
34  
35 205 approaches to designing and conducting clinical trials in order to make them less carbon intensive,  
36  
37 206 more environmentally sustainable and better value for money.  
38  
39  
40  
41  
42  
43  
44  
45  
46  
47  
48  
49  
50  
51  
52  
53  
54  
55  
56  
57  
58  
59  
60

1  
2 208  
3 209 **Contributors**

4  
5 210 The paper was conceived by NQ and JB. SB performed the carbon footprint calculations. NQ, JB, KH,  
6  
7 211 VC, CR, KM, CC, LR and HE reviewed and approved the final submitted manuscript.  
8  
9

10 212

11  
12 213 **Funding**

13  
14 214 The NightLife study is funded by the National Institute for Health and Care Research (NIHR) Health  
15  
16 215 Technology Assessment (HTA) programme (funder reference: NIHR127440). The views expressed are  
17  
18 216 those of the author(s) and not necessarily those of the NIHR or the Department of Health and Social  
19  
20 217 Care.  
21  
22

23 218

24  
25 219 **Competing interests**

26  
27 220 None declared.  
28  
29

30 221

31  
32 222 **Patient consent**

33  
34 223 Not required.  
35  
36

37 224

38  
39 225 **Provenance and peer review**

40  
41 226 Not commissioned; externally peer reviewed.  
42  
43

44 227

45  
46 228 **Data availability statement**

47  
48 229 No additional data available.  
49  
50  
51  
52  
53  
54  
55  
56  
57  
58  
59  
60

230 **References**

- 231 1. Mitchell EJ, Ahmed K, Breeman S, Cotton S, Constable L, Ferry G, et al. It is unprecedented:  
232 trial management during the COVID-19 pandemic and beyond. *Trials*. 2020;21(1):784.
- 233 2. Ltd BC. ISRCTN registry - Does NIGHT-time dialysis improve quality of LIFE? [Available from:  
234 <https://www.isrctn.com/ISRCTN87042063>.
- 235 3. NightLife. The NightLife study [Available from: <https://nightlifestudy.co.uk/>.
- 236 4. Donovan JL, Rooshenas L, Jepson M, Elliott D, Wade J, Avery K, et al. Optimising recruitment  
237 and informed consent in randomised controlled trials: the development and implementation of the  
238 Quintet Recruitment Intervention (QRI). *Trials*. 2016;17(1):283.
- 239 5. Cluley V. Using photovoice to include people with profound and multiple learning disabilities  
240 in inclusive research. *British Journal of Learning Disabilities*. 2017;45(1):39-46.
- 241 6. Cluley V, Pilnick A, Fyson R. Improving the inclusivity and credibility of visual research:  
242 interpretive engagement as a route to including the voices of people with learning disabilities in  
243 analysis. *Visual Studies*. 2021;36(4-5):524-36.
- 244 7. Carbon Calculator - Carbon Footprint Calculator For Individuals And Households [Available  
245 from: <https://www.carbonfootprint.com/calculator.aspx>.
- 246 8. Tierney S, Dawson S, Boylan A-M, Richards G, Park S, Turk A, et al. Broadening diversity  
247 through creative involvement to identify research priorities. *Research Involvement and Engagement*.  
248 2021;7(1):1-10.
- 249 9. Lyle K, Dent L, Bailey S, Kerridge L, Roberts I, Milne R. Carbon cost of pragmatic randomised  
250 controlled trials: retrospective analysis of sample of trials. *BMJ*. 2009;339.
- 251 10. Adshead F, Salman RA-S, Aumonier S, Collins M, Hood K, McNamara C, et al. A strategy to  
252 reduce the carbon footprint of clinical trials. *The Lancet*. 2021;398(10297):281-2.
- 253

1  
2  
3 254 **Figure title**  
4

5 255 **Figure 1.** Map of the UK showing geographical locations of patient experience group members  
6  
7  
8  
9  
10  
11  
12  
13  
14  
15  
16  
17  
18  
19  
20  
21  
22  
23  
24  
25  
26  
27  
28  
29  
30  
31  
32  
33  
34  
35  
36  
37  
38  
39  
40  
41  
42  
43  
44  
45  
46  
47  
48  
49  
50  
51  
52  
53  
54  
55  
56  
57  
58  
59  
60

For peer review only

1  
2  
3  
4  
5  
6  
7  
8  
9  
10  
11  
12  
13  
14  
15  
16  
17  
18  
19  
20  
21  
22  
23  
24  
25  
26  
27  
28  
29  
30  
31  
32  
33  
34  
35  
36  
37  
38  
39  
40  
41  
42  
43  
44  
45  
46  
47  
48  
49  
50  
51  
52  
53



Supplement: bmjopen-2022-070200.draft_revisions.pdf [file bmjopen-2022-070200.draft_revisions.pdf]
